# Supplementary material for: Phase variation in pneumococcal populations during carriage in the human nasopharynx
Source: PubMed Central journal article supplement (PMC7000782; doi:10.1038/s41598-020-58684-2), 2020-02-04
Supplement: 41598_2020_58684_MOESM1_ESM.pdf [file 41598_2020_58684_MOESM1_ESM.pdf]

Phase variation in pneumococcal populations during carriage in the human  
nasopharynx

Supplementary Materials

M. De Ste Croix<sup>1</sup>, E. Mitsi<sup>2</sup>, A. Morozov<sup>3</sup>, S. Glenn<sup>4</sup>, P.W. Andrew<sup>4</sup>, D. M. Ferreira<sup>2</sup> and M. R. Oggioni<sup>1\*</sup>

## Supplementary materials

A Markov chain model was developed to mimic the temporal variation of genetic composition of bacteria<sup>1</sup>. The main assumptions of the model are the following: (i) at each time step (cell division) mutations only depend on the current state of the cell (this is known as the Markov property), (ii) mutation probabilities are time-independent, and (iii) the growth (replication) rate of all genetic variants is assumed to be the same. The elements of the transition matrix determine the recombination probabilities at each division. To mimic possible mutations in the considered system the transition matrix should possess a particular structure (e.g. a large number of elements will be zeros); the detailed description of the matrix is provided below. The non-zero elements depend on a small number of parameters which were estimated by fitting experimental distributions of bacterial composition obtained when starting from different initial distributions of variants. The corresponding pseudo-code required to fit model parameters to empirical data is discussed in detail below.

### Model equations and parameters fit

Dynamics of variation of genetic composition of bacteria was modelled using the following discrete Markov chain with a stationary matrix<sup>1</sup>

$$X_{n+1} = X_n * P = X_0 * P^n,$$

where  $X_n$  is a row vector describing the percentage of different genetic variants within the population after  $n$  divisions ( $n=0$  corresponds to the initial distribution of variants); the sum of all elements of  $X_n$  should always add up to 1;  $P$  is the transition matrix of size 8x8 modelling inversion rates, i.e. transition between different variants within a single cell division. The matrix  $P$  is a Markov (stochastic) matrix, i.e. the sum of the elements of each row is always equal to 1, i.e.  $\sum_{j=1}^8 p_{i,j}=1$ . The meaning of each element  $p_{i,j}$  is the probability that the variant ' $i$ ' will invert (recombine) and become ' $j$ '.

In the vector  $X_n$ , we consider the following order of variants: (A<sub>1</sub>, A<sub>2</sub>, B, C, D<sub>1</sub>, D<sub>2</sub>, E, F).

The transition matrix  $P$  has the form described by the table below.

|  |                      |                      |          |          |                      |                      |          |          |
|--|----------------------|----------------------|----------|----------|----------------------|----------------------|----------|----------|
|  | <b>A<sub>1</sub></b> | <b>A<sub>2</sub></b> | <b>B</b> | <b>C</b> | <b>D<sub>1</sub></b> | <b>D<sub>2</sub></b> | <b>E</b> | <b>F</b> |
|--|----------------------|----------------------|----------|----------|----------------------|----------------------|----------|----------|

|                      |                               |                               |                               |                               |                               |                               |                               |                               |
|----------------------|-------------------------------|-------------------------------|-------------------------------|-------------------------------|-------------------------------|-------------------------------|-------------------------------|-------------------------------|
| <b>A<sub>1</sub></b> | $1-\alpha_1-\beta_1-\gamma_1$ | $\beta_1$                     | $\alpha_1$                    | $\gamma_1$                    | 0                             | 0                             | 0                             | 0                             |
| <b>A<sub>2</sub></b> | $\beta_1$                     | $1-\alpha_1-\beta_1-\gamma_1$ | 0                             | 0                             | 0                             | 0                             | $\alpha_1$                    | $\gamma_1$                    |
| <b>B</b>             | $\alpha_2$                    | 0                             | $1-\alpha_2-\beta_2-\gamma_2$ | 0                             | $\gamma_2$                    | 0                             | $\beta_2$                     | 0                             |
| <b>C</b>             | $\gamma_2$                    | 0                             | 0                             | $1-\alpha_2-\beta_2-\gamma_2$ | $\alpha_2$                    | 0                             | 0                             | $\beta_2$                     |
| <b>D<sub>1</sub></b> | 0                             | 0                             | $\gamma_1$                    | $\alpha_1$                    | $1-\alpha_1-\beta_1-\gamma_1$ | $\beta_1$                     | 0                             | 0                             |
| <b>D<sub>2</sub></b> | 0                             | 0                             | 0                             | 0                             | $\beta_1$                     | $1-\alpha_1-\beta_1-\gamma_1$ | $\gamma_1$                    | $\alpha_1$                    |
| <b>E</b>             | 0                             | $\alpha_3$                    | $\beta_3$                     | 0                             | 0                             | $\gamma_3$                    | $1-\alpha_3-\beta_3-\gamma_3$ | 0                             |
| <b>F</b>             | 0                             | $\gamma_3$                    | 0                             | $\beta_3$                     | 0                             | $\alpha_3$                    | 0                             | $1-\alpha_3-\beta_3-\gamma_3$ |

Here the coefficients  $\alpha_i, \beta_i, \gamma_i$  ( $i=1,2,3$ ) give the probability of the corresponding recombination which occurs via a single inversion event. Initially, we neglected the probability of having more than one inversion event at a time.

The elements  $p_{ij}$  in  $P$  were found by fitting the model to experimental data which provided the eventual distributions of variants starting from different initial conditions consisting of pure variants A<sub>2</sub>, B, C, D<sub>2</sub>, E and F. We assume that the final experimental data sets approximately corresponded to  $n=20$  cell divisions. As a formal criterion of goodness of fit to define the parameters  $\alpha_i, \beta_i, \gamma_i$ , we minimised the following score  $Q$  which is the sum of squares of the norms of deviations between the model prediction and the data

$$\begin{aligned}
Q(\alpha_i, \beta_i, \gamma_i) = & \sum_{i=1}^{k_A} \|X_{20}(A_2) - Y_i(A_2)\|^2 + \sum_{i=1}^{k_B} \|X_{20}(B) - Y_i(B)\|^2 \\
& + \sum_{i=1}^{k_C} \|X_{20}(C) - Y_i(C)\|^2 + \sum_{i=1}^{k_D} \|X_{20}(D_2) - Y_i(D_2)\|^2 \\
& + \sum_{i=1}^{k_E} \|X_{20}(E) - Y_i(E)\|^2 + \sum_{i=1}^{k_F} \|X_{20}(F) - Y_i(F)\|^2,
\end{aligned}$$

where  $X_{20}(Z)$  describes the distribution of variants in the model after  $n=20$  divisions starting from 100% of the variant Z;  $Y_m(Z)$  denotes the empirical distribution in experiment  $m$  (where  $m=1, \dots, k_Z$ ) starting from 100% of the variant Z, where Z is one of A<sub>2</sub>, B, C, D<sub>2</sub>, E, F. Here, by the norm  $\|X\|$  of a vector  $X$  we understand the square root of its scalar product with itself, i.e.  $\|X\| = \sqrt{X \cdot X}$ . Technically, minimisation of  $Q$  was implemented using the built-in MATLAB function ‘fminsearch’ which uses the Nelder-Mead simplex algorithm procedure of finding the minimum of a multivariable function. The detailed description of the Nelder-Mead algorithm can be found in the textbooks on optimisation<sup>2</sup>.

The brief pseudo-code showing how the function  $Q$  can be computed numerically is provided below.

***Pseudo-code for constructing function  $Q$***

- (1) Set the matrix  $P$  using parameters  $\alpha_i$ ,  $\beta_i$ , and  $\gamma_i$  (see the above table for  $P$ ).
- (2) Set (initially)  $Q=0$ .
- (3) Run simulations for  $l$  different initial conditions ( $l=6$  starting variants):  
for  $i=1:l$ 
  - (i) Download the final distributions  $Y_m(i)$  from data ( $i$  corresponds to any of A<sub>2</sub>, B, C, D<sub>2</sub>, E, F);  $m$  is the number of experimental set for the given  $i$  here  $m=1,2,.. k(i)$ .
  - (ii) Set the current initial distribution  $X_0$  starting from 100% of bacteria from the given variant  $i$ .
  - (iii) Run the model for  $n=20$  time iterations (cell divisions):  
for  $j=1: n$   
 $X_j = X_{j-1} * P$ ;  
end  
For each  $m$  find the difference between the model prediction and data:  
for  $m=1: k(i)$   
 $W_m = X_n - Y_m(i)$   
end  
Compute the increment in  $Q$  corresponding to variant  $i$ :  
for  $m=1: k(i)$   
 $Q = Q + W_m * W_m$  (symbol ‘\*’ signifies the scalar product)  
end  
end
- (4) Print the final  $Q$ .

In this study we explored both cases where  $\alpha_i$ ,  $\beta_i$ ,  $\gamma_i$  were distinct parameter for  $i=1,2,3$  (Model 1) and the case where they are identical (Model 2), i.e. when  $\alpha_1=\alpha_2=\alpha_3$ ,  $\beta_1=\beta_2=\beta_3$ ;  $\gamma_1=\gamma_2=\gamma_3$ . To compare the two models, we applied the Akaike information criterion by calculating the Akaike weights. The corresponding Akaike weight is calculated as

$$w = \frac{\exp((\Delta AIC)/2)}{\exp((\Delta AIC)/2) + 1}$$

where  $\Delta AIC$  is the difference in the Akaike score AIC between the models with the minimal and the maximal scores<sup>3</sup>. For the Akaike score of a model with  $m$  parameters and  $N$  experiments we can use the following approximation

$$AIC = 2m + N \ln(Q_{min}),$$

where  $Q_{min}$  is the minimised value of  $Q$ .

We obtained the following estimates for the parameters:

for **Model 1**:  $\alpha_1=0.0066$ ,  $\beta_1=0.0006$ ,  $\gamma_1=0.0012$ ,  $\alpha_2=0.0013$ ,  $\beta_2=0.0189$ ,  $\gamma_2=0.0005$ ,  $\alpha_2=0.0065$ ,  $\beta_2=0.0007$ ,  $\gamma_2=0.0019$ ,  $m=9$ .

for **Model 2**:  $\alpha=0.0779$ ,  $\beta=0.1063$ ,  $\gamma=0.0178$ ,  $m=3$ .

Calculation of the Akaike weight gave  $w \approx \exp(-55) \ll 1$ , which clearly favours Model 1.

1. Gagniuc, P. A. *Markov Chains: From Theory to Implementation and Experimentation*. (John Wiley & Sons, 2017).
2. Nash, J. C. *Compact Numerical Methods: Linear Algebra and Function Minimisation*. (Adam Hilger Ltd, 1979).
3. Burnham, K. P.; Anderson, D. R. *Model Selection and Multimodel Inference: A practical information-theoretic approach*. (Springer-Verlag, 2002).

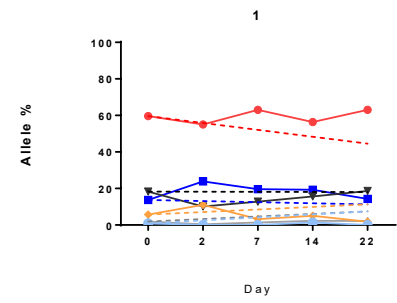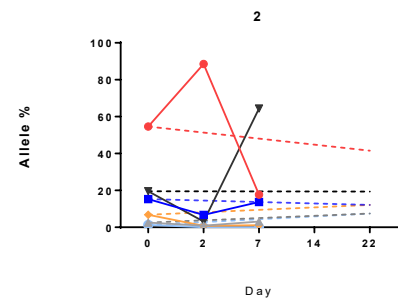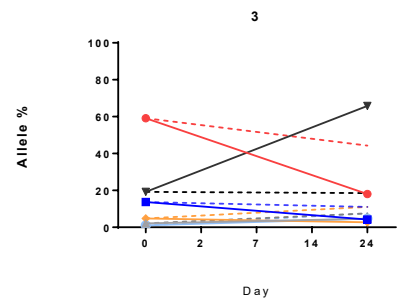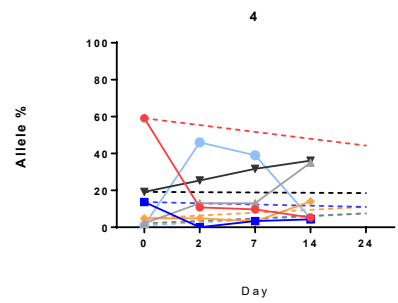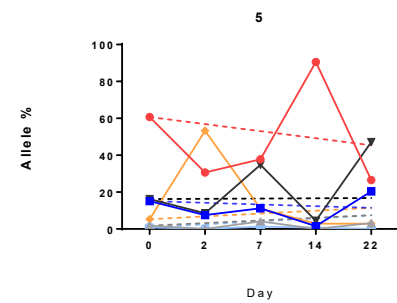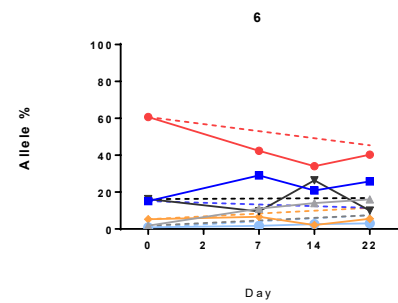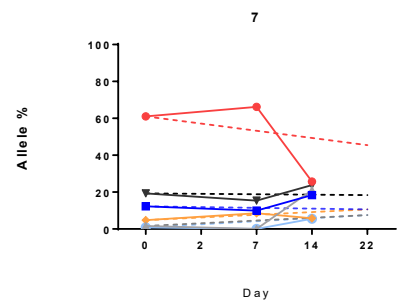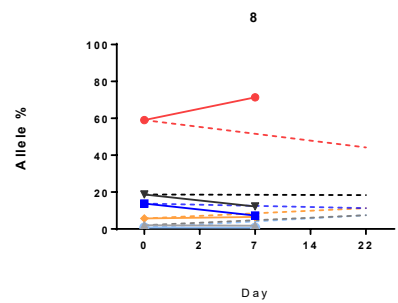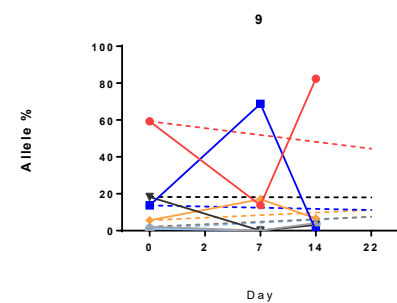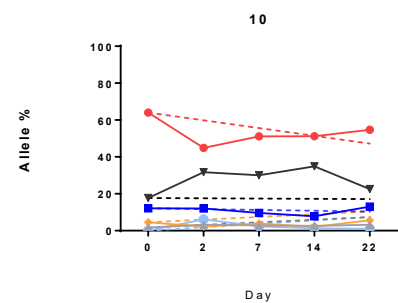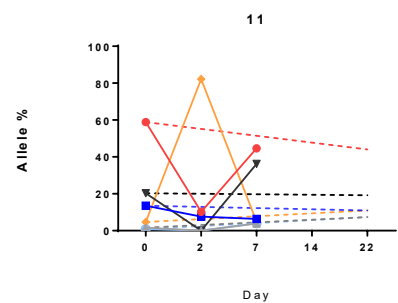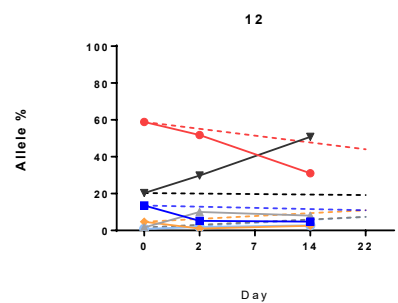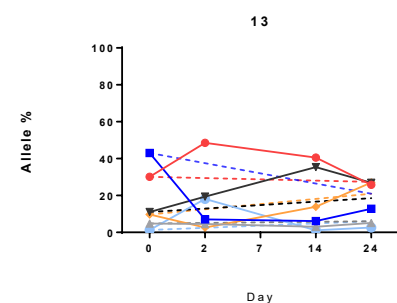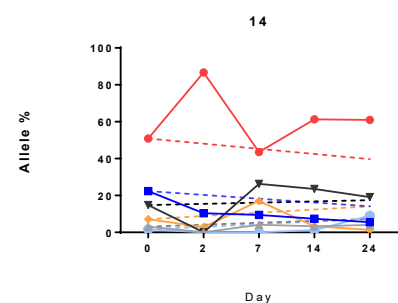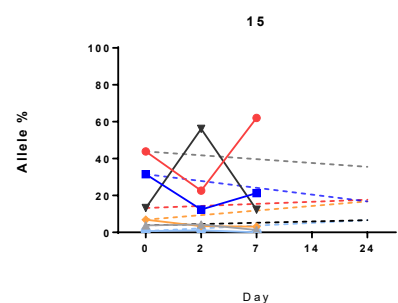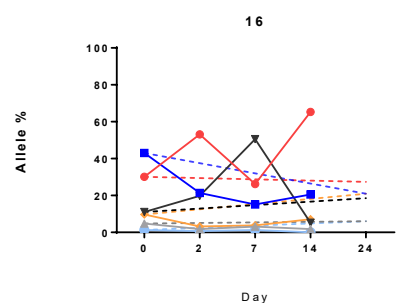

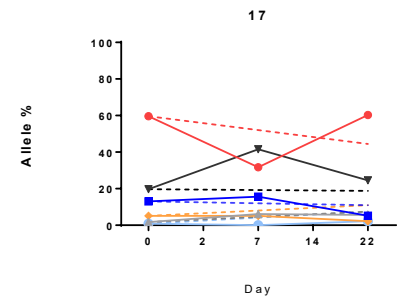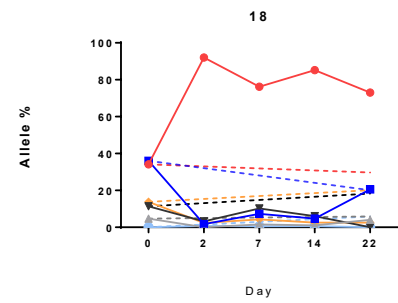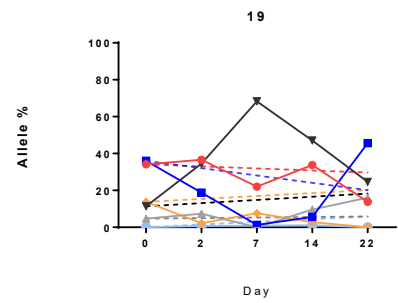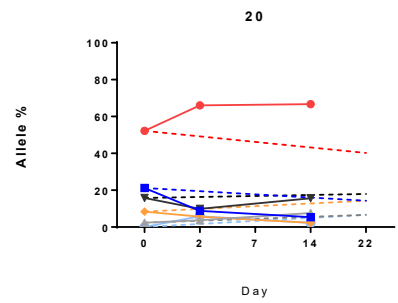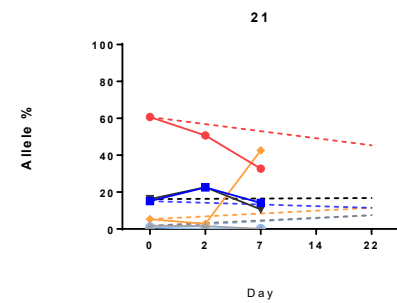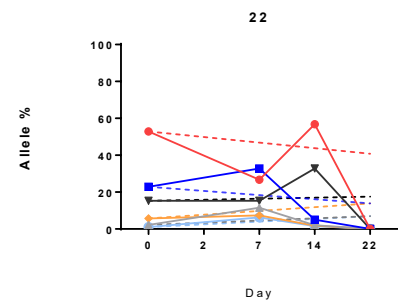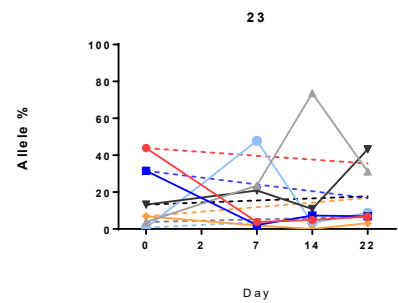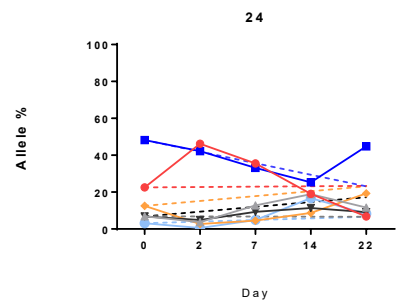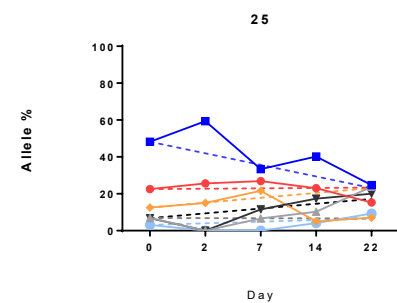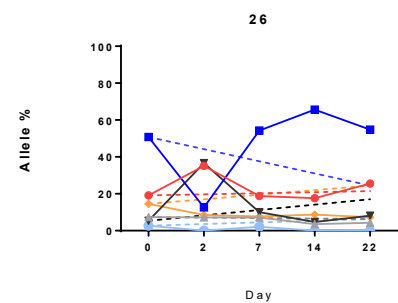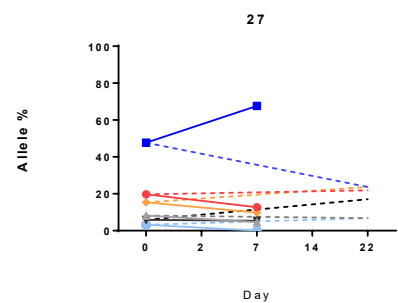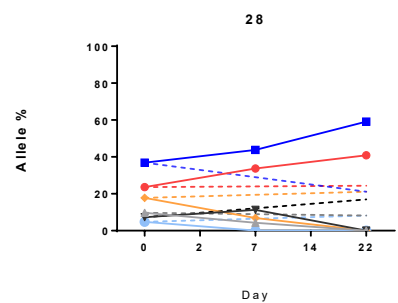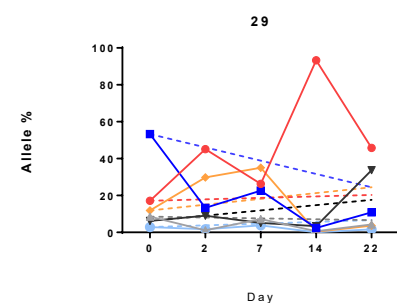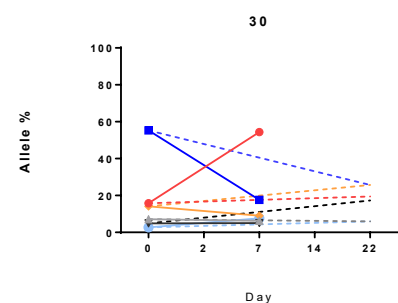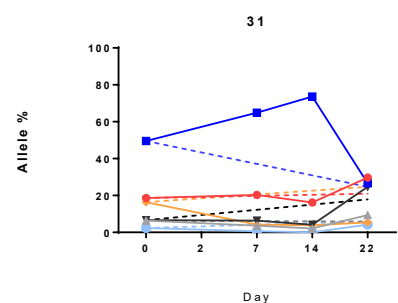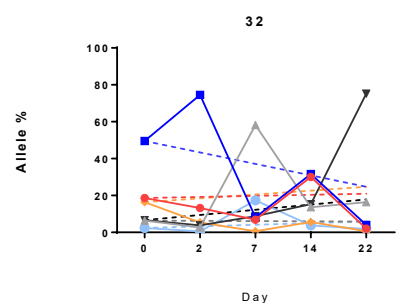

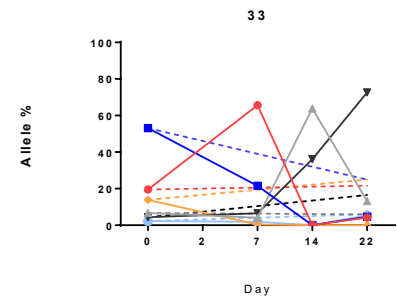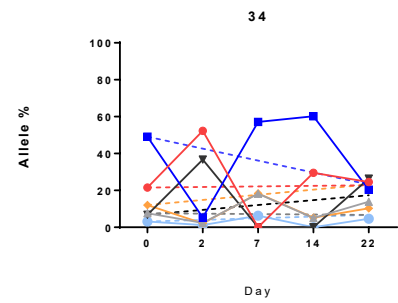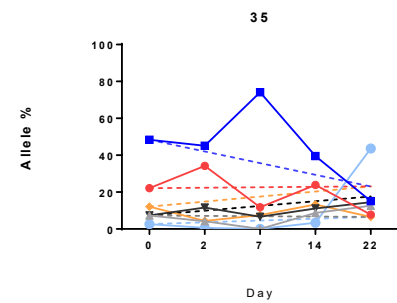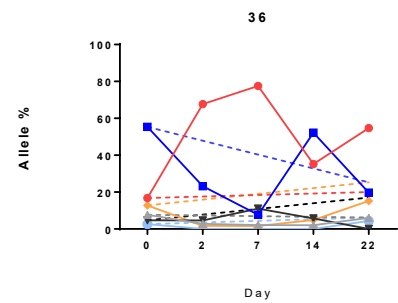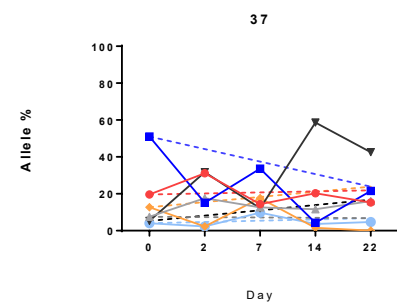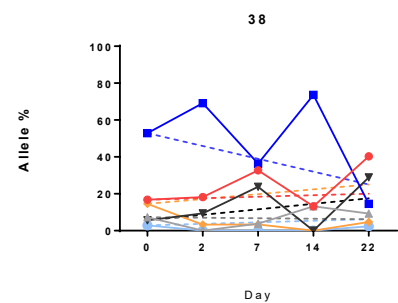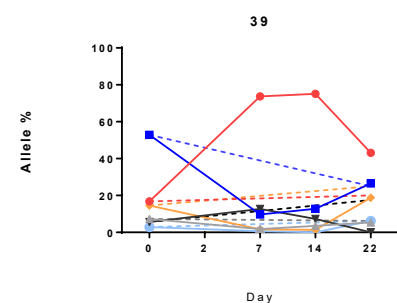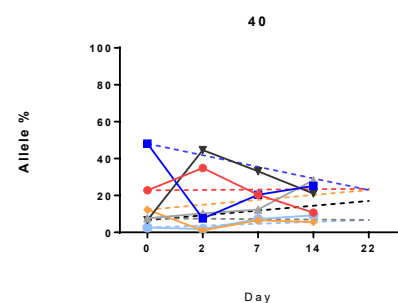



**Figure S1 - The observed and modelled active *hsdS* distribution in pneumococci recovered from the nasopharynx of individual volunteers**

The initial active *hsdS* gene distributions within inoculating doses of *S. pneumoniae* BHN418 were experimentally determined. This represents time point zero for both modelled (dashed lines) and experimentally quantified (solid lines) datasets. Experimentally quantified *hsdS* distributions are shown for individual volunteers (one volunteer per graph) over time as *hsdSA* (red), *hsdSB* (dark blue), *hsdSC* (grey), *hsdSD* (black), *hsdSE* (yellow) and *hsdSF* (light blue). Not all volunteers were carriage positive up to day 22, and for some time points fewer than 10 colonies were recovered and therefore not analysed.

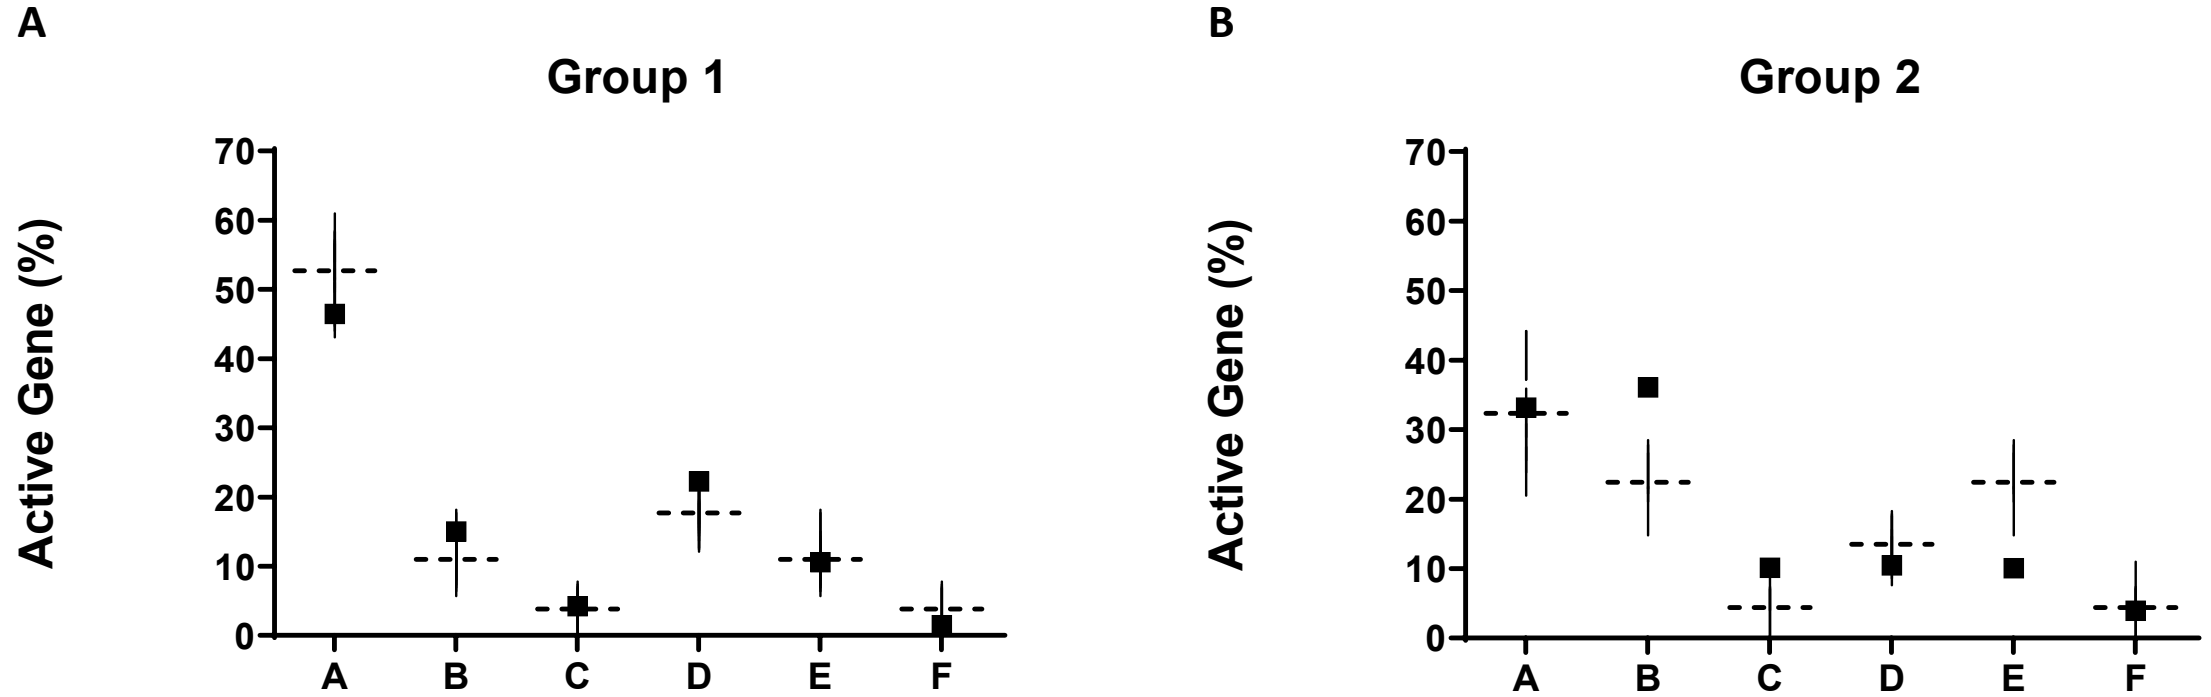

Figure S2- The observed versus expected active *hsdS* distribution in pneumococci recovered from the nasopharynx of individual volunteers at 7 days post colonisation

The initial active *hsdS* gene distributions within inoculating doses of *S. pneumoniae* BHN418 were experimentally determined. Experimentally quantified time points include all volunteers carriage positive by PCR. When the experimental outcomes of group one (panel A) and group two (panel B) were compared to the outcome predicted by the model at 7 days (84 generations) there were no significant differences were observed. Model range is shown by the vertical line, mean percentage of active genes is shown by squares.

Significance was tested used a student's T test with a Holm-Sidak correction, \* $p < 0.05$ , \*\* $p = 0.01$ , \*\*\* $p = 0.001$ , \*\*\*\* $p < 0.001$ .
